# Supplementary material
Source: PubMed Central journal article supplement (PMC9987464)
Supplement: Supplementary_Digital_Material1.pdf [file Supplementary_Digital_Material1.pdf]

SUPPLEMENTARY DIGITAL MATERIAL 1

Supplementary Table I.—Search strategy.

| Database | Search string                                                                                                                                                                            | N    |
|----------|------------------------------------------------------------------------------------------------------------------------------------------------------------------------------------------|------|
| PUBMED   | (gait [Title/Abstract] OR gait[MeshTerm] OR walkway[Title/Abstract]) AND (reliability[Title/Abstract] OR reproducibility[Title/Abstract] OR reproducibility of results[Title/Abstract] ) | 3144 |
| SCOPUS   | (TITLE-ABS ( gait ) OR TITLE-ABS ( walkway ) ) AND ( TITLE-ABS ( reliability ) OR TITLE-ABS ( reproducibility ) )                                                                        | 2193 |
| EMBASE   | (gait:ab,ti OR walkway:ab,ti) AND (reliability:ab,ti OR reproducibility:ab,ti)                                                                                                           | 2933 |
| TOTAL    |                                                                                                                                                                                          | 8270 |
