# Supplementary material
Source: PubMed Central journal article supplement (PMC9987464)
Supplement: Supplementary_Digital_Material2.pdf [file Supplementary_Digital_Material2.pdf]

SUPPLEMENTARY DIGITAL MATERIAL 2

Supplementary Table II.—Main characteristics and methodological quality of the included studies.

| Study                                  | Participants |       | Characteristics                                                                                    | Gait parameters   |                    |                    |                 |           |                      | Tool       | Experimental protocol |               |                 |                                    | COSMINQuality |
|----------------------------------------|--------------|-------|----------------------------------------------------------------------------------------------------|-------------------|--------------------|--------------------|-----------------|-----------|----------------------|------------|-----------------------|---------------|-----------------|------------------------------------|---------------|
|                                        | N            | Group |                                                                                                    | Gait Speed (cm/s) | Cadence (step/min) | Stride length (cm) | Stride time (s) | DST (%GC) | Base of support (cm) |            | Task                  |               | Walks per trial | Number of sessions (time interval) |               |
|                                        |              |       |                                                                                                    |                   |                    |                    |                 |           |                      |            | Single-task           | Dual-task     |                 |                                    |               |
| Chen <i>et al.</i> 2020 (31)           | 12           | AH    | Age:51.3±12.0 yrs;<br>M/F:5/7<br>Gait speed (ST):112.3±14.5 cm/s<br>Gait speed (DT):86.1±24.6 cm/s | ■                 | ■                  | ■                  | ■               | ■         | ■                    | ZW (4.3 m) | ■                     | ■ (count - 7) | 4               | 3 (1 wk)                           | ●●●○          |
| Decavel <i>et al.</i> 2019 (33)        | 19           | AH    | Age:46.6±8.6 yrs;<br>M/F:10/9<br>Gait speed (ST):150±20 cm/s<br>Gait speed (DT):140±20 cm/s        | ■                 | ■                  | ■                  | ■               | ■         | ■                    | GR (6.1 m) | ■                     | ■ (count - 7) | 1 (7.62 m)      | 2 (1 wk)                           | ●●●●          |
| Manor <i>et al.</i> 2019 (34)          | 14           | AH    | Age:29.6±4.2 yrs;<br>M/F: 6/8<br>Gait speed (ST, DT): -                                            | -                 | -                  | -                  | ■               | -         | -                    | GR (5.2 m) | ■                     | ■ (count - 3) | 3 (24 m)        | 2 (>1 wk)                          | ●●●●          |
| Ade <i>et al.</i> 2018 (35)            | 18           | AH    | Age:27.0±13.3 yrs;<br>M/F:14/4<br>Gait speed (ST):147.9±17.2 cm/s                                  | ■                 | ■                  | ■                  | -               | -         | ■                    | GR (9 m)   | ■                     | -             | 1 (13 m)        | 2 (4±2 d)                          | ●●●●          |
| Silsupadol <i>et al.</i> 2017 (36)     | 34           | AH    | Age:55.8±4.6 yrs;<br>M/F:15/8<br>Gait speed (ST): 111±21 cm/s                                      | ■                 | ■                  | -                  | -               | -         | -                    | GR (5.2 m) | ■                     | -             | 2 (10 m)        | 1                                  | ●○○○          |
| Schmitz-Hubsch <i>et al.</i> 2016 (37) | 9            | AH    | Age:50 [30–62] yrs;<br>M/F:3/6<br>Gait speed (ST): -                                               | -                 | ■                  | -                  | ■               | ■         | ■                    | GR (5.1 m) | ■                     | -             | 2 (8.1 m)       | 1                                  | ●○○○          |

|                                   |    |    |                                                                                                    |   |   |   |   |   |   |                  |   |                     |               |               |      |
|-----------------------------------|----|----|----------------------------------------------------------------------------------------------------|---|---|---|---|---|---|------------------|---|---------------------|---------------|---------------|------|
| Monticone <i>et al.</i> 2014 (38) | 25 | AH | Age:49.9±11.8 yrs;<br>M/F:5/20<br>Gait speed<br>(DT):83.9±15.7 cm/s                                | ■ | ■ | ■ | ■ | - | ■ | GR<br>(-)        | - | ■<br>(words)        | 1<br>(30 m)   | 2<br>(1 d)    | ●●●● |
| Paterson <i>et al.</i> 2008 (39)  | 13 | AH | Age:20.0±0.8 yrs;<br>M/F:0/13<br>Gait Speed (ST):171±<br>21 cm/s                                   | ■ | - | - | - | - | ■ | GR<br>(8.1<br>m) | ■ | -                   | 10<br>(~13 m) | 2<br>(1 wk)   | ●●●● |
| Menz <i>et al.</i> 2004 (40)      | 30 | AH | Age:28.5±4.8 yrs;<br>M/F:12/18<br>Gait Speed<br>(ST):143±14 cm/s                                   | ■ | ■ | - | - | - | - | GR<br>(4.6<br>m) | ■ | -                   | 3<br>(~8.6 m) | 2<br>(1 wk)   | ●●●○ |
| Bilney <i>et al.</i> 2003 (41)    | 25 | AH | Age:40.5±17.2 yrs;<br>M/F:13/12<br>Gait Speed (ST): 146<br>±16 cm/s                                | ■ | ■ | ■ | - | ■ | - | GR<br>(7.3<br>m) | ■ | -                   | 3<br>(13.3 m) | 1             | ●○○○ |
| Van Uden <i>et al.</i> 2004 (42)  | 21 | AH | Age:34 [19-59] yrs;<br>M/F:12/9<br>Gait Speed<br>(ST):143±20 cm/s                                  | ■ | - | ■ | ■ | - | ■ | GR<br>(6 m)      | ■ | -                   | 8<br>(~10m)   | 2<br>(1 wk)   | ●●●● |
| Steinert <i>et al.</i> 2019 (43)  | 44 | EY | Age:73.9±6.1 yrs;<br>M/F:22/22<br>Gait speed<br>(ST):120.7±19.9 cm/s                               | ■ | ■ | - | - | - | - | GR<br>(5.2<br>m) | ■ | -                   | 3             | 1             | ●○○○ |
| Byun <i>et al.</i> 2016 (44)      | 82 | EY | Age:68.7±6.14 yrs;<br>M/F:47/35<br>Gait speed (ST):<br>127±14 cm/s                                 | ■ | ■ | - | - | - | - | GR<br>(4.5<br>m) | ■ | -                   | 3<br>(20 m)   | 1             | ●○○○ |
| Hars <i>et al.</i> 2013 (45)      | 30 | EY | Age:75.2±6.9 yrs;<br>M/F:0/30<br>Gait speed<br>(ST):104±15 cm/s<br>Gait speed<br>(DT):95.5±20 cm/s | ■ | - | - | - | - | - | GR<br>(8.1<br>m) | ■ | ■<br>(count -<br>1) | 2<br>(12.1 m) | 1<br>(60 min) | ●○○○ |

|                                        |     |    |                                                                                                   |   |   |   |   |   |   |                  |   |                     |                |               |      |
|----------------------------------------|-----|----|---------------------------------------------------------------------------------------------------|---|---|---|---|---|---|------------------|---|---------------------|----------------|---------------|------|
| Hars <i>et al.</i> 2013<br>(45)        | 30  | EY | Age:83.5±5.5 yrs;<br>M/F:7/23<br>Gait speed (ST):60±17<br>cm/s<br>Gait speed<br>(DT):54.5±17 cm/s | ■ | - | - | - | - | - | GR<br>(8.1<br>m) | ■ | ■<br>(count -<br>1) | 2<br>(12.1 m)  | 1<br>(60 min) | ●○○○ |
| Beauchet <i>et al.</i> 2011<br>(46)    | 69  | EY | Age:75.5±4.3 yrs;<br>M/F:39/30<br>Gait speed (ST): -                                              | - | - | - | ■ | - | - | GR<br>(3.5<br>m) | ■ | ■<br>(count -<br>1) | 2<br>(~7.5m)   | 1             | ●○○○ |
| Youdas <i>et al.</i> 2010<br>(47)      | 24  | EY | Age:74±5 yrs;<br>M/F:13/11<br>Gait speed<br>(ST):127.2±24.2 cm/s                                  | ■ | ■ | ■ | - | - | - | GR<br>(5.2<br>m) | ■ | -                   | 3<br>(~15.7 m) | 1             | ●○○○ |
| Brach <i>et al.</i> 2008<br>(48)       | 558 | EY | Age:79.4±4 yrs;<br>M/F:219/339<br>Gait speed<br>(ST):100±23 cm/s                                  | ■ | - | - | - | - | ■ | GM II<br>(4 m)   | ■ | -                   | 4<br>(6 m)     | 1             | ●○○○ |
| Paterson <i>et al.</i> 2008<br>(39)    | 14  | EY | Age:67.9±7.8 yrs;<br>M/F:0/14<br>Gait Speed<br>(ST):103±25 cm/s                                   | ■ | - | - | - | - | ■ | GR<br>(8.1<br>m) | ■ | -                   | 10<br>(~13 m)  | 2<br>(1 wk)   | ●●●● |
| Menz <i>et al.</i> 2004<br>(40)        | 31  | EY | Age:80.8±3.1 yrs;<br>M/F:13/18<br>Gait Speed<br>(ST):116±21 cm/s                                  | ■ | ■ | - | - | - | - | GR<br>(4.6<br>m) | ■ | -                   | 3<br>(~8.6 m)  | 2<br>(1 wk)   | ●●●○ |
| Lemke <i>et al.</i> 2017<br>(55)       | 80  | CI | Age:82.7±5.9 yrs <sup>§</sup> ;<br>M/F: 29/76 <sup>§</sup><br>Gait speed<br>(DT):81.7±32.8 cm/s   | ■ | - | - | - | - | - | GR<br>(-)        | - | ■<br>(count -<br>3) | 1              | 2<br>(2-5 d)  | ●●●○ |
| Beauchet <i>et al.</i> 2011<br>(46)    | 14  | CI | Age:65.7±9.8 yrs;<br>M/F:13/1<br>Gait speed (ST,DT): -                                            | - | - | - | ■ | - | - | GR<br>(3.5<br>m) | ■ | ■<br>(count -<br>1) | 2<br>(~7.5m)   | 1             | ●○○○ |
| Montero-Odasso <i>et al.</i> 2009 (56) | 11  | CI | Age:76.6±7.3 yrs;<br>M/F:5/6                                                                      | ■ | - | ■ | ■ | - | - | GR<br>(-)        | ■ | ■                   | 3<br>(10 m)    | 2<br>(1 wk)   | ●●●○ |

|                                     |    |    |                                                                                                            |   |   |   |   |   |   |                 |             |                  |              |               |      |
|-------------------------------------|----|----|------------------------------------------------------------------------------------------------------------|---|---|---|---|---|---|-----------------|-------------|------------------|--------------|---------------|------|
|                                     |    |    | Gait speed<br>(ST):119.1±20.2 cm/s<br>Gait speed<br>(DT):111.4±18.7 cm/s                                   |   |   |   |   |   |   |                 | (count - 1) |                  |              |               |      |
| Wittwer <i>et al.</i> 2008 (57)     | 20 | CI | Age:80.6±5.2 yrs;<br>M/F:10/10<br>Gait Speed<br>(ST):107±21 cm/s                                           | ■ | ■ | ■ | - | - | ■ | GR<br>(8.3 m)   | ■           | -                | 3<br>(~10 m) | 2<br>(1 wk)   | ●●●● |
| Schmidheiny <i>et al.</i> 2015 (61) | 35 | VD | Age:59±18 yrs;<br>M/F:21/14<br>Gait speed (ST):<br>120±20 cm/s<br>Gait speed (DT):<br>105±25.5 cm/s        | ■ | ■ | - | - | - | - | GR<br>(7 m)     | ■           | ■<br>(count - 7) | 2<br>(11 m)  | 1<br>(10 min) | ●○○○ |
| Chen <i>et al.</i> 2020 (31)        | 18 | MS | Age:49.7±12.2 yrs;<br>M/F:4/14<br>Gait speed (ST):<br>90.8±38.4 cm/s<br>Gait speed (DT):<br>78.6±38.7 cm/s | ■ | ■ | ■ | ■ | ■ | ■ | ZW<br>(4.3 m)   | ■           | ■<br>(count - 7) | 4            | 3<br>(1 wk)   | ●●●○ |
| Decavel <i>et al.</i> 2019 (33)     | 58 | MS | Age:51±12 yrs;<br>M/F:21/37<br>Gait speed (ST):80±40 cm/s<br>Gait speed (DT):60±30 cm/s                    | ■ | ■ | ■ | ■ | ■ | ■ | GR<br>(6.1 m)   | ■           | ■<br>(count - 7) | 1<br>(7.62m) | 2<br>(1 wk)   | ●●●○ |
| Monticone <i>et al.</i> 2014 (38)   | 25 | MS | Age:49±12 yrs;<br>M/F:8/17<br>Gait speed<br>(DT):56.2±18.5 cm/s                                            | ■ | ■ | ■ | ■ | - | ■ | GR<br>(-)       | -           | ■<br>(words)     | 1<br>(30 m)  | 2<br>(1 wk)   | ●●●○ |
| Xu <i>et al.</i> 2017 (62)          | 32 | PD | Age:64.4±10.4 yrs <sup>§</sup> ;<br>M/F: 27/24 <sup>§</sup><br>Gait speed (ST):<br>66±20 cm/s              | ■ | ■ | ■ | ■ | - | - | USEW<br>(9.8 m) | ■           | -                | 2            | 1             | ●○○○ |

|                                        |    |    |                                                                                                           |   |   |   |   |   |   |                  |   |                     |               |                |      |
|----------------------------------------|----|----|-----------------------------------------------------------------------------------------------------------|---|---|---|---|---|---|------------------|---|---------------------|---------------|----------------|------|
| Schmitz-Hubsch <i>et al.</i> 2016 (37) | 8  | CA | Age:53.0 [29–70] yrs;<br>M/F:5/3<br>Gait speed (ST): -                                                    | - | ■ | - | ■ | ■ | ■ | GR<br>(5.1<br>m) | ■ | -                   | 2<br>(8.1 m)  | 1              | ●○○○ |
| Rao <i>et al.</i> 2005 (63)            | 12 | HD | Age:50.0±8.0 yrs;<br>M/F:7/5<br>Gait Speed (ST):<br>103±21 cm/s                                           | ■ | ■ | ■ | ■ | - | ■ | GR<br>(4.6<br>m) | ■ | -                   | 2<br>(10m)    | 1<br>(30 min)  | ●○○○ |
| Lewek <i>et al.</i> 2019 (49)          | 32 | SK | Age:58.0±11.0 yrs <sup>§</sup> ;<br>M/F:34/42 <sup>§</sup><br>Gait speed (ST):<40<br>cm/s                 | ■ | - | - | - | - | - | GR<br>(-)        | ■ | -                   | 3             | 2<br>(19±13 d) | ●●●○ |
| Lewek <i>et al.</i> 2019 (49)          | 29 | SK | Age:58.0±11.0 yrs <sup>§</sup> ;<br>M/F:34/42 <sup>§</sup><br>Gait speed (ST): [40-<br>80] cm/s           | ■ | - | - | - | - | - | GR<br>(-)        | ■ | -                   | 3             | 2<br>(19±13 d) | ●●●○ |
| Lewek <i>et al.</i> 2019 (49)          | 15 | SK | Age: 58.0±11.0 yrs <sup>§</sup> ;<br>M/F:34/42 <sup>§</sup><br>Gait speed (ST):>80<br>cm/s                | ■ | - | - | - | - | - | GR<br>(-)        | ■ | -                   | 3             | 2<br>(19±13 d) | ●●●○ |
| Cho <i>et al.</i> 2015 (50)            | 43 | SK | Age:53.0±4.0 yrs;<br>M/F:23/20<br>Gait speed (ST):<br>65.9±13.2 cm/s<br>Gait speed (DT):<br>40.3±9.8 cm/s | ■ | ■ | ■ | - | - | - | GR<br>(8.1<br>m) | ■ | ■<br>(count -<br>1) | 1<br>(12.1 m) | 2<br>(1-2 d)   | ●●●○ |
| Peters <i>et al.</i> 2014 (51)         | 12 | SK | Age:59.6±11.4 yrs;<br>M/F:8/4<br>Gait speed (ST):<br>25±11 cm/s                                           | ■ | - | - | - | - | - | GR<br>(5.3<br>m) | ■ | -                   | 2             | 1              | ●○○○ |
| Peters <i>et al.</i> 2014 (51)         | 24 | SK | Age:65±10 yrs;<br>M/F:15/9<br>Gait speed (ST):<br>56±11 cm/s                                              | ■ | - | - | - | - | - | GR<br>(5.3<br>m) | ■ | -                   | 2             | 1              | ●○○○ |

|                                        |    |     |                                                                |   |   |   |   |   |   |                  |   |   |               |               |      |
|----------------------------------------|----|-----|----------------------------------------------------------------|---|---|---|---|---|---|------------------|---|---|---------------|---------------|------|
| Peters <i>et al.</i> 2014<br>(51)      | 26 | SK  | Age:63±15 yrs;<br>M/F:16/10<br>Gait speed (ST):<br>103±16 cm/s | ■ | - | - | - | - | - | GR<br>(5.3<br>m) | ■ | - | 2             | 1             | ●○○○ |
| Kuys <i>et al.</i> 2011<br>(52)        | 21 | SK  | Age:64±13 yrs;<br>M/F:11/10<br>Gait speed (ST):<br>65±23 cm/s  | ■ | ■ | - | - | - | - | GR<br>(9 m)      | ■ | - | 1<br>(~11 m)  | 2<br>(<2 d)   | ●●●● |
| Lewek <i>et al.</i> 2011<br>(53)       | 26 | SK  | Age:56±11 yrs;<br>M/F:15/11<br>Gait speed (ST):<br>70±25 cm/s  | ■ | - | - | - | - | - | GR<br>(5.2<br>m) | ■ | - | 3<br>(~8.2 m) | 2<br>(11±8 d) | ●●○○ |
| Vartiainen <i>et al.</i><br>2009 (54)  | 20 | SK  | Age:37±12 yrs;<br>M/F:11/9<br>Gait speed (ST):<br>79±34 cm/s   | ■ | ■ | - | - | - | - | GR<br>(-)        | ■ | - | 3<br>(10 m)   | 1             | ●○○○ |
| Perez-Sanpablo <i>et al.</i> 2017 (58) | 23 | SCI | Age:46±13 yrs;<br>M/F:15/8<br>Gait speed (ST): -               | ■ | ■ | - | - | ■ | ■ | GR<br>(5.2<br>m) | ■ | - | 3<br>(10 m)   | 1<br>(2 min)  | ●○○○ |
| Nair <i>et al.</i> 2012 (59)           | 16 | SCI | Age:42±11 yrs;<br>M/F:13/3<br>Gait speed (ST):<br>50±35 cm/s   | ■ | ■ | - | - | - | - | GM II<br>(-)     | ■ | - | 2             | 2<br>(1-2 wk) | ●●●● |
| Rome <i>et al.</i> 2005<br>(60)        | 50 | RA  | Age:60±10 yrs;<br>M/F:12/38<br>Gait Speed (ST):<br>102±37 cm/s | ■ | ■ | ■ | ■ | - | ■ | GR<br>(4.6<br>m) | ■ | - | 2             | 1             | ●○○○ |

■: Data reported in the study; -: Data not reported in the study; COSMIN Quality judgement: ●○○○ Inadequate, ●●○○ Doubtful, ●●●○ Adequate, ●●●● Very Good.

§The data is referred to the whole population included in the study and not to the subgroup involved in the reliability analysis.

AH: healthy adult; CA: Spinocerebellar Ataxia Type 14; CI: cognitive impairment; COSMIN: COnsensus-based Standards for the selection of health Measurement INstruments; count -: count backwards; d: days; DT: Dual-Task Condition; EY: elderly; GM II: GaitMat II; GR: GaitRite®; HD: Huntington's disease; M/F: Male/Female; MS: multiple sclerosis; PD: Parkinson's disease; RA: Rheumatoid Arthritis; SCI: spinal cord injury; SK: Stroke; ST: Single-Task condition; VD: vestibular dysfunction; wk: weeks; words: reciting words starting with a predefine letter; yrs: years ZW: ZenoWalkway.

## References

1. Baker R. Gait analysis methods in rehabilitation. *J Neuroeng Rehabil.* 2006;3:1–10.
2. Rispens SM, Van Schooten KS, Pijnappels M, Daffertshofer A, Beek PJ, Van Dieën JH. Identification of fall risk predictors in daily life measurements: Gait characteristics' reliability and association with self-reported fall history. *Neurorehabil Neural Repair.* 2015;29(1):54–61.
3. Pistacchi M, Gioulis M, Sanson F, de Giovannini E, Filippi G, Rossetto F, *et al.* Gait analysis and clinical correlations in early Parkinson's disease. *Funct Neurol.* 2017;32(1):28–34.
4. Liu B, Hu X, Zhang Q, Fan Y, Li J, Zou R, *et al.* Usual walking speed and all-cause mortality risk in older people: A systematic review and meta-analysis. *Gait Posture.* 2016;44:172–7.
5. Chamberlin ME, Fulwider BD, Sanders SL, Medeiros JM. Does fear of falling influence spatial and temporal gait parameters in elderly persons beyond changes associated with normal aging? *Journals Gerontol - Ser A Biol Sci Med Sci.* 2005;60(9):1163–7.
6. Kikkert LHJC, Vuillerme N, Van Campen JP, Appels BA, Hortobágyi T, Lamothe CJ. Gait characteristics and their discriminative power in geriatric patients with and without cognitive impairment. *J Neuroeng Rehabil.* 2017;14(1):1–10.
7. Bridenbaugh SA, Kressig RW. Motor cognitive dual tasking: Early detection of gait impairment, fall risk and cognitive decline. *Z Gerontol Geriatr.* 2015;48(1):15–21.
8. Bayot M, Dujardin K, Dissaux L, Tard C, Defebvre L, Bonnet CT, *et al.* Can dual-task paradigms predict Falls better than single task? – A systematic literature review. *Neurophysiol Clin.* 2020;50(6):401–40.
9. Spildooren J, Vercruyse S, Desloovere K, Vandenberghe W, Kerckhofs E, Nieuwboer A. Freezing of gait in Parkinson's disease: The impact of dual-tasking and turning. *Mov Disord.* 2010;25(15):2563–70.
10. Pieruccini-Faria F, Jones JA, Almeida QJ. Motor planning in Parkinson's disease patients experiencing freezing of gait: The influence of cognitive load when approaching obstacles. *Brain Cogn.* 2014;87(1):76–85.
11. Hillel I, Gazit E, Nieuwboer A, Avanzino L, Rochester L, Cereatti A, *et al.* Is every-day walking in older adults more analogous to dual-task walking or to usual walking? Elucidating the gaps between gait performance in the lab and during 24/7 monitoring. *Eur Rev Aging Phys Act.* 2019;16(1):1–12.
12. Feld JA, Plummer P. Patterns of cognitive-motor dual-task interference post stroke: An observational inpatient study at hospital discharge. *Eur J Phys Rehabil Med.* 2021;57(3):327–36.
13. Bryant MS, Workman CD, Jackson GR. Multidirectional walk test in individuals with Parkinson's disease: A validity study. *Int J Rehabil Res.* 2015;38(1):88–91.
14. Ferrarello F, Bianchi VAM, Baccini M, Rubbieri G, Mossello E, Cavallini MC, *et al.* Tools for observational gait analysis in patients with stroke: A systematic review. *Phys Ther.* 2013;93(12):1673–85.
15. Schlachetzki JCM, Barth J, Marxreiter F, Gossler J, Kohl Z, Reinfelder S, *et al.* Wearable sensors objectively measure gait parameters in Parkinson's disease. *PLoS One.* 2017;12(10):1–18.
16. Ambrosini E, Parati M, Peri E, De Marchis C, Nava C, Pedrocchi A, *et al.* Changes in leg cycling muscle synergies after training augmented by functional electrical stimulation in subacute stroke survivors: a pilot study. *J Neuroeng Rehabil.* 2020;17(1):1–14.
17. Muro-de-la-Herran A, García-Zapirain B, Méndez-Zorrilla A. Gait analysis methods: An overview of wearable and non-wearable systems, highlighting clinical applications. *Sensors* 2014;14(2):3362–94.
18. MejiaCruz Y, Franco J, Hainline G, Fritz S, Jiang Z, Caicedo J, *et al.* Walking Speed Measurement Technology: a Review. *Curr Geriatr Reports.* 2021;10:32–41.
19. Cleland BT, Arshad H, Madhavan S. Concurrent validity of the GAITRite electronic walkway and the 10-m walk test for measurement of walking speed after stroke. *Gait Posture.* 2019;68:458–60.
20. McDonough AL, Batavia M, Chen FC, Kwon S, Ziai J. The validity and reliability of the GAITRite system's measurements: A preliminary evaluation. *Arch Phys Med Rehabil.* 2001;82(3):419–25.
21. Weir JP. Quantifying test-retest reliability using the intraclass correlation coefficient and the SEM. *J Strength Cond Res.* 2005;19(1):231–40.
22. Beninato M, Portney LG. Applying concepts of responsiveness to patient management in neurologic physical therapy. *J Neurol Phys Ther.* 2011;35(2):75–81.
23. Liberati A, Altman DG, Tetzlaff J, Mulrow C, Gøtzsche PC, Ioannidis JPA, *et al.* The PRISMA statement for reporting systematic reviews and meta-analyses of studies that evaluate healthcare interventions: explanation and elaboration. *BMJ.* 2009;339:1.
24. Mokkink LB, Prinsen CA, Patrick DL, Alonso J, Bouter LM, de Vet HC, *et al.* COSMIN manual for systematic reviews of PROMs. COSMIN; 2018 [Internet]. Available from: [https://cosmin.nl/wp-content/uploads/COSMIN-syst-review-for-PROMs-manual\\_version-1\\_feb-2018.pdf](https://cosmin.nl/wp-content/uploads/COSMIN-syst-review-for-PROMs-manual_version-1_feb-2018.pdf) [cited 2021, Jan 4].
25. Hollman JH, McDade EM, Petersen RC. Normative spatiotemporal gait parameters in older adults. *Gait Posture.* 2011;34(1):111–8.
26. Mokkink LB, de Vet HCW, Prinsen CAC, Patrick DL, Alonso J, Bouter LM, *et al.* COSMIN Risk of Bias checklist for systematic reviews of Patient-Reported Outcome Measures. *Qual Life Res.* 2018;27(5):1171–9.

27. Mokkink LB, Terwee CB, Patrick DL, Alonso J, Stratford PW, Knol DL, *et al.* The COSMIN checklist for assessing the methodological quality of studies on measurement properties of health status measurement instruments: An international Delphi study. *Qual Life Res.* 2010;19(4):539–49.
28. Koo TK, Li MY. A Guideline of Selecting and Reporting Intraclass Correlation Coefficients for Reliability Research. *J Chiropr Med.* 2016;15(2):155–63.
29. Klotzbier TJ, Wollesen B, Vogel O, Rudisch J, Cordes T, Jöllenbeck T, *et al.* An interrater reliability study of gait analysis systems with the dual task paradigm in healthy young and older adults. *Eur Rev Aging Phys Act.* 2021;18(1):1–12.
30. Atkinson G, Nevill A. Statistical Methods For Assessing Measurement Error (Reliability) in Variables Relevant to Sports Medicine. *Sport Med.* 1998;26(4):217–38.
31. Chen A, Kirkland MC, Wadden KP, Wallack EM, Ploughman M. Reliability of gait and dual-task measures in multiple sclerosis. *Gait Posture.* 2020;78:19–25.
32. Viechtbauer W. Conducting meta-analyses in R with the metafor. *J Stat Softw.* 2010;36(3):1–48.
33. Decavel P, Moulin T, Sagawa Y. Gait tests in multiple sclerosis: Reliability and cut-off values. *Gait Posture.* 2019;67:37–42.
34. Manor B, Yu W, Zhu H, Harrison R, Lo OY, Lipsitz L, *et al.* Smartphone app-based assessment of gait during normal and dual-task walking: Demonstration of validity and reliability. *JMIR mHealth uHealth.* 2018;6(1).
35. Ade V, Schalkwijk D, Psarakis M, Laporte MD, Faras TJ, Sandoval R, *et al.* Between session reliability of heel-to-toe progression measurements in the stance phase of gait. *PLoS One.* 2018;13(7):1–6.
36. Silsupadol P, Teja K, Lugade V. Reliability and validity of a smartphone-based assessment of gait parameters across walking speed and smartphone locations: Body, bag, belt, hand, and pocket. *Gait Posture.* 2017;58:516–22.
37. Schmitz-Hübsch T, Brandt AU, Pfueller C, Zange L, Seidel A, Kühn AA, *et al.* Accuracy and repeatability of two methods of gait analysis - GaitRite™ und Mobility Lab™ - in subjects with cerebellar ataxia. *Gait Posture.* 2016;48:194–201.
38. Monticone M, Ambrosini E, Fiorentini R, Rocca B, Liquori V, Pedrocchi A, *et al.* Reliability of spatial-temporal gait parameters during dual-task interference in people with multiple sclerosis. A cross-sectional study. *Gait Posture.* 2014;40(4):715–8.
39. Paterson KL, Hill KD, Lythgo ND, Maschette W. The Reliability of Spatiotemporal Gait Data for Young and Older Women During Continuous Overground Walking. *Arch Phys Med Rehabil.* 2008;89(12):2360–5.
40. Menz HB, Latt MD, Tiedemann A, Kwan MMS, Lord SR. Reliability of the GAITRite® walkway system for the quantification of temporo-spatial parameters of gait in young and older people. *Gait Posture.* 2004;20(1):20–5.
41. Bilney B, Morris M, Webster K. Concurrent related validity of the GAITRite® walkway system for quantification of the spatial and temporal parameters of gait. *Gait Posture.* 2003;17(1):68–74.
42. Uden CJT Van, Besser MP. Test-retest reliability of temporal and spatial gait characteristics measured with an instrumented walkway system ( GAITRite ® ). *BMC Musculoskelet Disord.* 2004;5(13):1471–4.
43. Steinert A, Sattler I, Otte K, Röhling H, Mansow-Model S, Müller-Werdan U. Using new camera-based technologies for gait analysis in older adults in comparison to the established GAITrite system. *Sensors* 2020;20:1.
44. Byun S, Han JW, Kim TH, Kim KW. Test-retest reliability and concurrent validity of a single tri-axial accelerometer-based gait analysis in older adults with normal cognition. *PLoS One.* 2016;11(7):1–12.
45. Hars M, Herrmann FR, Trombetti A. Reliability and minimal detectable change of gait variables in community-dwelling and hospitalized older fallers. *Gait Posture.* 2013;38(4):1010–4.
46. Beauchet O, Freiberger E, Annweiler C, Kressig R, Herrmann F, Allali G. Test-retest reliability of stride time variability while dual tasking in healthy and demented adults with frontotemporal degeneration. *J Neuroeng Rehabil.* 2011;8(1):37.
47. Youdas JW, Childs KB, McNeil ML, Mueller AC, Quilter CM, Hollman JH. Responsiveness of 2 Procedures for Measurement of Temporal and Spatial Gait Parameters in Older Adults. *PM R.* 2010;2(6):537–43.
48. Brach JS, Perera S, Studenski S, Newman AB. The Reliability and Validity of Measures of Gait Variability in Community-Dwelling Older Adults. *Arch Phys Med Rehabil.* 2008;89(12):2293–6.
49. Lewek MD, Sykes R. Minimal Detectable Change for Gait Speed Depends on Baseline Speed in Individuals with Chronic Stroke. *J Neurol Phys Ther.* 2019;43(2):122–7.
50. Cho KH, Lee HJ, Lee WH. Test-retest reliability of the GAITRite walkway system for the spatio-temporal gait parameters while dual-tasking in post-stroke patients. *Disabil Rehabil.* 2015;37(6):512–6.
51. Peters DM, Middleton A, Donley JW, Blanck EL, Fritz SL. Concurrent validity of walking speed values calculated via the GAITRite electronic walkway and 3 meter walk test in the chronic stroke population. *Physiother Theory Pract.* 2014;30(3):183–8.



52. Kuys SS, Brauer SG, Ada L. Test-retest reliability of the GAITRite system in people with stroke undergoing rehabilitation. *Disabil Rehabil.* 2011;33:1848–53.
53. Lewek MD, Randall EP. Reliability of spatiotemporal asymmetry during overground walking for individuals following chronic stroke. *J Neurol Phys Ther.* 2011;35(3):116–21.
54. Vartiainen M V., Savolainen S, Alaranta HT. Reliability and agreement in gait measurements among patients with brain injury. *Adv Physiother.* 2009;11(1):22–9.
55. Lemke NC, Wiloth S, Werner C, Hauer K. Validity, test-retest reliability, sensitivity to change and feasibility of motor-cognitive dual task assessments in patients with dementia. *Arch Gerontol Geriatr.* 2017;70:169–79.
56. Montero-Odasso M, Casas A, Hansen KT, Bilski P, Gutmanis I, Wells JL, *et al.* Quantitative gait analysis under dual-task in older people with mild cognitive impairment: A reliability study. *J Neuroeng Rehabil.* 2009;6(1):1–6.
57. Wittwer JE, Webster KE, Andrews PT, Menz HB. Test-retest reliability of spatial and temporal gait parameters of people with Alzheimer’s disease. *Gait Posture.* 2008;28(3):392–6.
58. Pérez-Sanpablo AI, Quinzaños-Fresnedo J, Loera-Cruz R, Quiñones-Uriostegui I, Rodriguez-Reyes G, Pérez-Zavala R. Validation of the instrumented evaluation of spatio-temporal gait parameters in patients with motor incomplete spinal cord injury. *Spinal Cord.* 2017;55(7):699–704.
59. Nair MP, Hornby GT, Behrman LA. Minimal detectable change for spatial and temporal measurements of gait after incomplete spinal cord injury. *Top Spinal Cord Inj Rehabil.* 2012;18(3):273–81.
60. Rome K, Hanchard NC. Within-day reliability of temporal–spatial gait parameters associated with rheumatoid arthritic feet. *Musculoskeletal Care.* 2005;3(1):17–23.
61. Schmidheiny A, Swanenburg J, Straumann D, De Bruin ED, Knols RH. Discriminant validity and test re-test reproducibility of a gait assessment in patients with vestibular dysfunction. *BMC Ear, Nose Throat Disord.* 2015;15(1):1–10.
62. Xu S, Cheng N, Liu Y, Wang X, Yang X, Sun Y, *et al.* Reliability and validity of the assessment of Parkinson gait using the U-shape electronic walkway. *Proceedings of the 2016 IEEE Advanced Information Management, Communicates, Electronic and Automation Control Conference (IMCEC); 2016 Oct 3–5; Xi’an, China.*
63. Rao AK, Quinn L, Marder KS. Reliability of spatiotemporal gait outcome measures in Huntington’s disease. *Mov Disord.* 2005;20(8):1033–7.
64. Vallabhajosula S, Humphrey SK, Cook AJ, Freund JE. Concurrent Validity of the Zeno Walkway for Measuring Spatiotemporal Gait Parameters in Older Adults. *J Geriatr Phys Ther.* 2019;42(3):42–50.
65. Egerton T, Thingstad P, Helbostad JL. Comparison of programs for determining temporal-spatial gait variables from instrumented walkway data: PKmas *versus* GAITRite. *BMC Res Notes.* 2014;7(1):1–7.
66. Yang L, Liao LR, Lam FMH, He CQ, Pang MYC. Psychometric properties of dual-task balance assessments for older adults: A systematic review. *Maturitas.* 2015;80(4):359–69.
67. Yang L, Lam FMH, Liao LR, Huang MZ, He CQ, Pang MYC. Psychometric properties of dual-task balance and walking assessments for individuals with neurological conditions: A systematic review. *Gait Posture.* 2017;52:110–23.
68. Terrier P, Reynard F. Effect of age on the variability and stability of gait: A cross-sectional treadmill study in healthy individuals between 20 and 69 years of age. *Gait Posture.* 2015;41(1):170–4.
69. Donelan JM, Shipman DW, Kram R, Kuo AD. Mechanical and metabolic requirements for active lateral stabilization in human walking. *J Biomech.* 2004;37(6):827–35.
70. Beninato M, Fernandes A, Plummer LS. Minimal clinically important difference of the Functional Gait Assessment in older adults. *Phys Ther.* 2014;94(11):1594–603.
