# Supplementary material
Source: PubMed Central journal article supplement (PMC9987464)
Supplement: Supplementary_Digital_Material3.pdf [file Supplementary_Digital_Material3.pdf]

SUPPLEMENTARY DIGITAL MATERIAL 3

Supplementary Table III.—Included studies.

|                                        |    | Pati        | App   | Sim         | App         | Oth   |
|----------------------------------------|----|-------------|-------|-------------|-------------|-------|
| Chen <i>et al.</i> 2020 (31)           | AH | Green       | Green | Light Green | Green       | Green |
| Decavel <i>et al.</i> 2019 (33)        | AH | Green       | Green | Green       | Green       | Green |
| Manor <i>et al.</i> 2019 (34)          | AH | Green       | Green | Green       | Green       | Green |
| Ade <i>et al.</i> 2018 (35)            | AH | Green       | Green | Green       | Green       | Green |
| Silsupadol <i>et al.</i> 2017 (36)     | AH | Green       | Red   | Light Green | Green       | Green |
| Schmitz-Hubsch <i>et al.</i> 2016 (37) | AH | Light Green | Red   | Green       | Green       | Green |
| Monticone <i>et al.</i> 2014 (38)      | AH | Green       | Green | Green       | Green       | Green |
| Paterson <i>et al.</i> 2008 (39)       | AH | Green       | Green | Green       | Green       | Green |
| Menz <i>et al.</i> 2004 (40)           | AH | Light Green | Green | Green       | Light Green | Green |
| Bilney <i>et al.</i> 2003 (41)         | AH | Green       | Red   | Green       | Green       | Green |
| Van Uden <i>et al.</i> 2004 (42)       | AH | Green       | Red   | Green       | Green       | Green |
| Steinert <i>et al.</i> 2019 (43)       | EY | Light Green | Red   | Green       | Light Green | Green |
| Byun <i>et al.</i> 2016 (44)           | EY | Green       | Red   | Green       | Green       | Green |
| Hars <i>et al.</i> 2013 (45)           | EY | Light Green | Red   | Green       | Green       | Green |
| Hars <i>et al.</i> 2013 (45)           | EY | Light Green | Red   | Green       | Green       | Green |
| Beauchet <i>et al.</i> 2011 (46)       | EY | Light Green | Red   | Yellow      | Light Green | Green |
| Youdas <i>et al.</i> 2010 (47)         | EY | Light Green | Red   | Yellow      | Light Green | Green |
| Brach <i>et al.</i> 2008 (48)          | EY | Light Green | Red   | Yellow      | Light Green | Green |
| Paterson <i>et al.</i> 2008 (39)       | EY | Green       | Green | Green       | Green       | Green |
| Menz <i>et al.</i> 2004 (40)           | EY | Light Green | Green | Green       | Light Green | Green |
| Lemke <i>et al.</i> 2017 (55)          | CI | Light Green | Green | Green       | Green       | Green |
| Beauchet <i>et al.</i> 2011 (46)       | CI | Light Green | Red   | Yellow      | Light Green | Green |
| Montero-Odasso <i>et al.</i> 2009 (56) | CI | Light Green | Green | Green       | Green       | Green |
| Wittwer <i>et al.</i> 2008 (57)        | CI | Green       | Green | Green       | Green       | Green |
| Schmidheiny <i>et al.</i> 2015 (61)    | VD | Light Green | Red   | Light Green | Green       | Green |
| Chen <i>et al.</i> 2020 (31)           | MS | Light Green | Green | Light Green | Green       | Green |
| Decavel <i>et al.</i> 2019 (33)        | MS | Light Green | Green | Green       | Green       | Green |
| Monticone <i>et al.</i> 2014 (38)      | MS | Light Green | Green | Green       | Green       | Green |
| Xu <i>et al.</i> 2017 (62)             | PD | Light Green | Red   | Green       | Green       | Green |

|                                          |     |           |           |           |           |           |
|------------------------------------------|-----|-----------|-----------|-----------|-----------|-----------|
| Schmitz-Hubsch <i>et al.</i> . 2016 (37) | CA  | Very good | Poor      | Very good | Very good | Very good |
| Rao <i>et al.</i> 2005 (63)              | HD  | Very good | Poor      | Very good | Very good | Doubtful  |
| Lewek <i>et al.</i> 2019 (49)            | SK  | Very good | Adequate  | Very good | Very good | Very good |
| Lewek <i>et al.</i> 2019 (49)            | SK  | Very good | Adequate  | Very good | Very good | Very good |
| Lewek <i>et al.</i> 2019 (49)            | SK  | Very good | Adequate  | Very good | Very good | Very good |
| Cho <i>et al.</i> 2015 (50)              | SK  | Adequate  | Very good | Very good | Very good | Very good |
| Peters <i>et al.</i> 2014 (51)           | SK  | Adequate  | Poor      | Adequate  | Very good | Very good |
| Peters <i>et al.</i> 2014 (51)           | SK  | Adequate  | Poor      | Adequate  | Very good | Very good |
| Peters <i>et al.</i> 2014 (51)           | SK  | Adequate  | Poor      | Adequate  | Very good | Very good |
| Kuys <i>et al.</i> 2011 (52)             | SK  | Very good |
| Lewek <i>et al.</i> 2011 (53)            | SK  | Adequate  | Doubtful  | Very good | Very good | Very good |
| Vartiainen <i>et al.</i> 2009 (54)       | SK  | Adequate  | Poor      | Very good | Very good | Very good |
| Perez-Sanpablo <i>et al.</i> 2017 (58)   | SCI | Doubtful  | Poor      | Very good | Adequate  | Doubtful  |
| Nair <i>et al.</i> 2012 (59)             | SCI | Very good |
| Rome <i>et al.</i> 2005 (60)             | RA  | Adequate  | Poor      | Very good | Very good | Very good |

### JUDGEMENT

|           |           |
|-----------|-----------|
| Very good | Very good |
| Adequate  | Adequate  |
| Doubtful  | Doubtful  |
| Poor      | Poor      |

## References

1. Baker R. Gait analysis methods in rehabilitation. *J Neuroeng Rehabil.* 2006;3:1–10.
2. Rispens SM, Van Schooten KS, Pijnappels M, Daffertshofer A, Beek PJ, Van Dieën JH. Identification of fall risk predictors in daily life measurements: Gait characteristics' reliability and association with self-reported fall history. *Neurorehabil Neural Repair.* 2015;29(1):54–61.
3. Pistacchi M, Gioulis M, Sanson F, de Giovannini E, Filippi G, Rossetto F, *et al.* Gait analysis and clinical correlations in early Parkinson's disease. *Funct Neurol.* 2017;32(1):28–34.
4. Liu B, Hu X, Zhang Q, Fan Y, Li J, Zou R, *et al.* Usual walking speed and all-cause mortality risk in older people: A systematic review and meta-analysis. *Gait Posture.* 2016;44:172–7.
5. Chamberlin ME, Fulwider BD, Sanders SL, Medeiros JM. Does fear of falling influence spatial and temporal gait parameters in elderly persons beyond changes associated with normal aging? *Journals Gerontol - Ser A Biol Sci Med Sci.* 2005;60(9):1163–7.
6. Kikkert LHJC, Vuillerme N, Van Campen JP, Appels BA, Hortobágyi T, Lamoth CJ. Gait characteristics and their discriminative power in geriatric patients with and without cognitive impairment. *J Neuroeng Rehabil.* 2017;14(1):1–10.
7. Bridenbaugh SA, Kressig RW. Motor cognitive dual tasking: Early detection of gait impairment, fall risk and cognitive decline. *Z Gerontol Geriatr.* 2015;48(1):15–21.
8. Bayot M, Dujardin K, Dissaux L, Tard C, Defebvre L, Bonnet CT, *et al.* Can dual-task paradigms predict Falls better than single task? – A systematic literature review. *Neurophysiol Clin.* 2020;50(6):401–40.
9. Spildooren J, Vercruyse S, Desloovere K, Vandenberghe W, Kerckhofs E, Nieuwboer A. Freezing of gait in Parkinson's disease: The impact of dual-tasking and turning. *Mov Disord.* 2010;25(15):2563–70.
10. Pieruccini-Faria F, Jones JA, Almeida QJ. Motor planning in Parkinson's disease patients experiencing freezing of gait: The influence of cognitive load when approaching obstacles. *Brain Cogn.* 2014;87(1):76–85.
11. Hillel I, Gazit E, Nieuwboer A, Avanzino L, Rochester L, Cereatti A, *et al.* Is every-day walking in older adults more analogous to dual-task walking or to usual walking? Elucidating the gaps between gait performance in the lab and during 24/7 monitoring. *Eur Rev Aging Phys Act.* 2019;16(1):1–12.
12. Feld JA, Plummer P. Patterns of cognitive-motor dual-task interference post stroke: An observational inpatient study at hospital discharge. *Eur J Phys Rehabil Med.* 2021;57(3):327–36.
13. Bryant MS, Workman CD, Jackson GR. Multidirectional walk test in individuals with

Parkinson's disease: A validity study. *Int J Rehabil Res.* 2015;38(1):88–91.

14. Ferrarello F, Bianchi VAM, Baccini M, Rubbieri G, Mossello E, Cavallini MC, *et al.* Tools for observational gait analysis in patients with stroke: A systematic review. *Phys Ther.* 2013;93(12):1673–85.
15. Schlachetzki JCM, Barth J, Marxreiter F, Gossler J, Kohl Z, Reinfelder S, *et al.* Wearable sensors objectively measure gait parameters in Parkinson's disease. *PLoS One.* 2017;12(10):1–18.
16. Ambrosini E, Parati M, Peri E, De Marchis C, Nava C, Pedrocchi A, *et al.* Changes in leg cycling muscle synergies after training augmented by functional electrical stimulation in subacute stroke survivors: a pilot study. *J Neuroeng Rehabil.* 2020;17(1):1–14.
17. Muro-de-la-Herran A, García-Zapirain B, Méndez-Zorrilla A. Gait analysis methods: An overview of wearable and non-wearable systems, highlighting clinical applications. *Sensors* 2014;14(2):3362–94.
18. MejiaCruz Y, Franco J, Hainline G, Fritz S, Jiang Z, Caicedo J, *et al.* Walking Speed Measurement Technology: a Review. *Curr Geriatr Reports.* 2021;10:32–41.
19. Cleland BT, Arshad H, Madhavan S. Concurrent validity of the GAITRite electronic walkway and the 10-m walk test for measurement of walking speed after stroke. *Gait Posture.* 2019;68:458–60.
20. McDonough AL, Batavia M, Chen FC, Kwon S, Ziai J. The validity and reliability of the GAITRite system's measurements: A preliminary evaluation. *Arch Phys Med Rehabil.* 2001;82(3):419–25.
21. Weir JP. Quantifying test-retest reliability using the intraclass correlation coefficient and the SEM. *J Strength Cond Res.* 2005;19(1):231–40.
22. Beninato M, Portney LG. Applying concepts of responsiveness to patient management in neurologic physical therapy. *J Neurol Phys Ther.* 2011;35(2):75–81.
23. Liberati A, Altman DG, Tetzlaff J, Mulrow C, Gøtzsche PC, Ioannidis JPA, *et al.* The PRISMA statement for reporting systematic reviews and meta-analyses of studies that evaluate healthcare interventions: explanation and elaboration. *BMJ.* 2009;339:1.
24. Mokkink LB, Prinsen CA, Patrick DL, Alonso J, Bouter LM, de Vet HC, *et al.* COSMIN manual for systematic reviews of PROMs. COSMIN; 2018 [Internet]. Available from: [https://cosmin.nl/wp-content/uploads/COSMIN-syst-review-for-PROMs-manual\\_version-1\\_feb-2018.pdf](https://cosmin.nl/wp-content/uploads/COSMIN-syst-review-for-PROMs-manual_version-1_feb-2018.pdf) [cited 2021, Jan 4].
25. Hollman JH, McDade EM, Petersen RC. Normative spatiotemporal gait parameters in older adults. *Gait Posture.* 2011;34(1):111–8.

26. Mokkink LB, de Vet HCW, Prinsen CAC, Patrick DL, Alonso J, Bouter LM, *et al.* COSMIN Risk of Bias checklist for systematic reviews of Patient-Reported Outcome Measures. *Qual Life Res.* 2018;27(5):1171–9.
27. Mokkink LB, Terwee CB, Patrick DL, Alonso J, Stratford PW, Knol DL, *et al.* The COSMIN checklist for assessing the methodological quality of studies on measurement properties of health status measurement instruments: An international Delphi study. *Qual Life Res.* 2010;19(4):539–49.
28. Koo TK, Li MY. A Guideline of Selecting and Reporting Intraclass Correlation Coefficients for Reliability Research. *J Chiropr Med.* 2016;15(2):155–63.
29. Klotzbier TJ, Wollesen B, Vogel O, Rudisch J, Cordes T, Jöllenbeck T, *et al.* An interrater reliability study of gait analysis systems with the dual task paradigm in healthy young and older adults. *Eur Rev Aging Phys Act.* 2021;18(1):1–12.
30. Atkinson G, Nevill A. Statistical Methods For Assessing Measurement Error (Reliability) in Variables Relevant to Sports Medicine. *Sport Med.* 1998;26(4):217–38.
31. Chen A, Kirkland MC, Wadden KP, Wallack EM, Ploughman M. Reliability of gait and dual-task measures in multiple sclerosis. *Gait Posture.* 2020;78:19–25.
32. Viechtbauer W. Conducting meta-analyses in R with the metafor. *J Stat Softw.* 2010;36(3):1–48.
33. Decavel P, Moulin T, Sagawa Y. Gait tests in multiple sclerosis: Reliability and cut-off values. *Gait Posture.* 2019;67:37–42.
34. Manor B, Yu W, Zhu H, Harrison R, Lo OY, Lipsitz L, *et al.* Smartphone app-based assessment of gait during normal and dual-task walking: Demonstration of validity and reliability. *JMIR mHealth uHealth.* 2018;6(1).
35. Ade V, Schalkwijk D, Psarakis M, Laporte MD, Faras TJ, Sandoval R, *et al.* Between session reliability of heel-to-toe progression measurements in the stance phase of gait. *PLoS One.* 2018;13(7):1–6.
36. Silsupadol P, Teja K, Lugade V. Reliability and validity of a smartphone-based assessment of gait parameters across walking speed and smartphone locations: Body, bag, belt, hand, and pocket. *Gait Posture.* 2017;58:516–22.
37. Schmitz-Hübsch T, Brandt AU, Pfueller C, Zange L, Seidel A, Kühn AA, *et al.* Accuracy and repeatability of two methods of gait analysis - GaitRite<sup>TM</sup> und Mobility Lab<sup>TM</sup> - in subjects with cerebellar ataxia. *Gait Posture.* 2016;48:194–201.
38. Monticone M, Ambrosini E, Fiorentini R, Rocca B, Liquori V, Pedrocchi A, *et al.* Reliability of spatial-temporal gait parameters during dual-task interference in people with multiple

- sclerosis. A cross-sectional study. *Gait Posture*. 2014;40(4):715–8.
39. Paterson KL, Hill KD, Lythgo ND, Maschette W. The Reliability of Spatiotemporal Gait Data for Young and Older Women During Continuous Overground Walking. *Arch Phys Med Rehabil*. 2008;89(12):2360–5.
  40. Menz HB, Latt MD, Tiedemann A, Kwan MMS, Lord SR. Reliability of the GAITRite® walkway system for the quantification of temporo-spatial parameters of gait in young and older people. *Gait Posture*. 2004;20(1):20–5.
  41. Bilney B, Morris M, Webster K. Concurrent related validity of the GAITRite® walkway system for quantification of the spatial and temporal parameters of gait. *Gait Posture*. 2003;17(1):68–74.
  42. Uden CJT Van, Besser MP. Test-retest reliability of temporal and spatial gait characteristics measured with an instrumented walkway system ( GAITRite ® ). *BMC Musculoskelet Disord*. 2004;5(13):1471–4.
  43. Steinert A, Sattler I, Otte K, Röbling H, Mansow-Model S, Müller-Werdan U. Using new camera-based technologies for gait analysis in older adults in comparison to the established GAITrite system. *Sensors* 2020;20:1.
  44. Byun S, Han JW, Kim TH, Kim KW. Test-retest reliability and concurrent validity of a single tri-axial accelerometer-based gait analysis in older adults with normal cognition. *PLoS One*. 2016;11(7):1–12.
  45. Hars M, Herrmann FR, Trombetti A. Reliability and minimal detectable change of gait variables in community-dwelling and hospitalized older fallers. *Gait Posture*. 2013;38(4):1010–4.
  46. Beauchet O, Freiberger E, Annweiler C, Kressig R, Herrmann F, Allali G. Test-retest reliability of stride time variability while dual tasking in healthy and demented adults with frontotemporal degeneration. *J Neuroeng Rehabil*. 2011;8(1):37.
  47. Youdas JW, Childs KB, McNeil ML, Mueller AC, Quilter CM, Hollman JH. Responsiveness of 2 Procedures for Measurement of Temporal and Spatial Gait Parameters in Older Adults. *PM R*. 2010;2(6):537–43.
  48. Brach JS, Perera S, Studenski S, Newman AB. The Reliability and Validity of Measures of Gait Variability in Community-Dwelling Older Adults. *Arch Phys Med Rehabil*. 2008;89(12):2293–6.
  49. Lewek MD, Sykes R. Minimal Detectable Change for Gait Speed Depends on Baseline Speed in Individuals with Chronic Stroke. *J Neurol Phys Ther*. 2019;43(2):122–7.
  50. Cho KH, Lee HJ, Lee WH. Test-retest reliability of the GAITRite walkway system for the

spatio-temporal gait parameters while dual-tasking in post-stroke patients. *Disabil Rehabil.* 2015;37(6):512–6.

51. Peters DM, Middleton A, Donley JW, Blanck EL, Fritz SL. Concurrent validity of walking speed values calculated via the GAITRite electronic walkway and 3 meter walk test in the chronic stroke population. *Physiother Theory Pract.* 2014;30(3):183–8.
52. Kuys SS, Brauer SG, Ada L. Test-retest reliability of the GAITRite system in people with stroke undergoing rehabilitation. *Disabil Rehabil.* 2011;33:1848–53.
53. Lewek MD, Randall EP. Reliability of spatiotemporal asymmetry during overground walking for individuals following chronic stroke. *J Neurol Phys Ther.* 2011;35(3):116–21.
54. Vartiainen M V., Savolainen S, Alaranta HT. Reliability and agreement in gait measurements among patients with brain injury. *Adv Physiother.* 2009;11(1):22–9.
55. Lemke NC, Wiloth S, Werner C, Hauer K. Validity, test-retest reliability, sensitivity to change and feasibility of motor-cognitive dual task assessments in patients with dementia. *Arch Gerontol Geriatr.* 2017;70:169–79.
56. Montero-Odasso M, Casas A, Hansen KT, Bilski P, Gutmanis I, Wells JL, *et al.* Quantitative gait analysis under dual-task in older people with mild cognitive impairment: A reliability study. *J Neuroeng Rehabil.* 2009;6(1):1–6.
57. Wittwer JE, Webster KE, Andrews PT, Menz HB. Test-retest reliability of spatial and temporal gait parameters of people with Alzheimer’s disease. *Gait Posture.* 2008;28(3):392–6.
58. Pérez-Sanpablo AI, Quinzaños-Fresnedo J, Loera-Cruz R, Quiñones-Uriostegui I, Rodríguez-Reyes G, Pérez-Zavala R. Validation of the instrumented evaluation of spatio-temporal gait parameters in patients with motor incomplete spinal cord injury. *Spinal Cord.* 2017;55(7):699–704.
59. Nair MP, Hornby GT, Behrman LA. Minimal detectable change for spatial and temporal measurements of gait after incomplete spinal cord injury. *Top Spinal Cord Inj Rehabil.* 2012;18(3):273–81.
60. Rome K, Hanchard NC. Within-day reliability of temporal–spatial gait parameters associated with rheumatoid arthritic feet. *Musculoskeletal Care.* 2005;3(1):17–23.
61. Schmidheiny A, Swanenburg J, Straumann D, De Bruin ED, Knols RH. Discriminant validity and test re-test reproducibility of a gait assessment in patients with vestibular dysfunction. *BMC Ear, Nose Throat Disord.* 2015;15(1):1–10.
62. Xu S, Cheng N, Liu Y, Wang X, Yang X, Sun Y, *et al.* Reliability and validity of the assessment of Parkinson gait using the U-shape electronic walkway. *Proceedings of the 2016 IEEE Advanced Information Management, Communicates, Electronic and Automation*

Control Conference (IMCEC); 2016 Oct 3–5; Xi'an, China.

63. Rao AK, Quinn L, Marder KS. Reliability of spatiotemporal gait outcome measures in Huntington's disease. *Mov Disord*. 2005;20(8):1033–7.
64. Vallabhajosula S, Humphrey SK, Cook AJ, Freund JE. Concurrent Validity of the Zeno Walkway for Measuring Spatiotemporal Gait Parameters in Older Adults. *J Geriatr Phys Ther*. 2019;42(3):42–50.
65. Egerton T, Thingstad P, Helbostad JL. Comparison of programs for determining temporal-spatial gait variables from instrumented walkway data: PKmas *versus* GAITRite. *BMC Res Notes*. 2014;7(1):1–7.
66. Yang L, Liao LR, Lam FMH, He CQ, Pang MYC. Psychometric properties of dual-task balance assessments for older adults: A systematic review. *Maturitas*. 2015;80(4):359–69.
67. Yang L, Lam FMH, Liao LR, Huang MZ, He CQ, Pang MYC. Psychometric properties of dual-task balance and walking assessments for individuals with neurological conditions: A systematic review. *Gait Posture*. 2017;52:110–23.
68. Terrier P, Reynard F. Effect of age on the variability and stability of gait: A cross-sectional treadmill study in healthy individuals between 20 and 69 years of age. *Gait Posture*. 2015;41(1):170–4.
69. Donelan JM, Shipman DW, Kram R, Kuo AD. Mechanical and metabolic requirements for active lateral stabilization in human walking. *J Biomech*. 2004;37(6):827–35.
70. Beninato M, Fernandes A, Plummer LS. Minimal clinically important difference of the Functional Gait Assessment in older adults. *Phys Ther*. 2014;94(11):1594–603.
